# Supplementary material
Source: MDPI journal article supplement (https://www.mdpi.com/2073-4336/3/1/1)
Supplement: s1 [file s1]

**Supplementary Material**

**Instructions Study 1**

Please imagine the following situation:

Mister Simon Weber, received an endowment of 100 Euros. He was requested to divide this amount among himself, you, and another person, Mister Paulsen. He was asked how he wanted to allocate the 100 Euros, and he made the following decision:

*Situation 1:*

From the total 100 Euros, Simon Weber wants to give **20 Euro** to you, and **20 Euro** to Mister Paulsen.

It is now up to you, how this situation will end. You may choose among three options.

Please select

**one** option:

You accept the offer and everybody obtains the allocated amount. [ ]

You and Mister Paulsen obtain nothing, but Simon Weber may keep his share. [ ]

You and Simon Weber obtain nothing, but Mister Paulsen may keep his share. [ ]

*How satisfied do you feel right now?*

o-----o-----o-----o-----o-----o-----o-----o

0 1 2 3 4 5 6 7

not satisfied very

at all satisfied

*Do you consider Simon Weber’s offer fair?*

o-----o-----o-----o-----o-----o-----o-----o

0 1 2 3 4 5 6 7

very unfair very fair

*Situation 2:*

From the total 100 Euros, Simon Weber wants to give **1 Euro** to you, and **20 Euro** to Mister Paulsen.

It is now up to you, how this situation will end. You may choose among three options.

Please select

**one** option:

You accept the offer and everybody obtains the allocated amount. [ ]

You and Mister Paulsen obtain nothing, but Simon Weber may keep his share. [ ]

You and Simon Weber obtain nothing, but Mister Paulsen may keep his share. [ ]

*How satisfied do you feel right now?*

o-----o-----o-----o-----o-----o-----o-----o

0 1 2 3 4 5 6 7

not satisfied very

at all satisfied

*Do you consider Simon Weber’s offer fair?*

o-----o-----o-----o-----o-----o-----o-----o

0 1 2 3 4 5 6 7

very unfair very fair

*Situation 3:*

From the total 100 Euros, Simon Weber wants to give **1 Euro** to you, and **1 Euro** to Mister Paulsen.

It is now up to you, how this situation will end. You may choose among three options.

Please select

**one** option:

You accept the offer and everybody obtains the allocated amount. [ ]

You and Mister Paulsen obtain nothing, but Simon Weber may keep his share. [ ]

You and Simon Weber obtain nothing, but Mister Paulsen may keep his share. [ ]

*How satisfied do you feel right now?*

o-----o-----o-----o-----o-----o-----o-----o

0 1 2 3 4 5 6 7

not satisfied very

at all satisfied

*Do you consider Simon Weber’s offer fair?*

o-----o-----o-----o-----o-----o-----o-----o

0 1 2 3 4 5 6 7

very unfair very fair

*Situation 4:*

From the total 100 Euros, Simon Weber wants to give **20 Euro** to you, and **1 Euro** to Mister Paulsen.

It is now up to you, how this situation will end. You may choose among three options.

Please select

**one** option:

You accept the offer and everybody obtains the allocated amount. [ ]

You and Mister Paulsen obtain nothing, but Simon Weber may keep his share. [ ]

You and Simon Weber obtain nothing, but Mister Paulsen may keep his share. [ ]

*How satisfied do you feel right now?*

o-----o-----o-----o-----o-----o-----o-----o

0 1 2 3 4 5 6 7

not satisfied very

at all satisfied

*Do you consider Simon Weber’s offer fair?*

o-----o-----o-----o-----o-----o-----o-----o

0 1 2 3 4 5 6 7

very unfair very fair

*Situation 5:*

From the total 100 Euros, Simon Weber wants to give **1 Euro** to you, and **40 Euro** to Mister Paulsen.

It is now up to you, how this situation will end. You may choose among three options.

Please select

**one** option:

You accept the offer and everybody obtains the allocated amount. [ ]

You and Mister Paulsen obtain nothing, but Simon Weber may keep his share. [ ]

You and Simon Weber obtain nothing, but Mister Paulsen may keep his share. [ ]

*How satisfied do you feel right now?*

o-----o-----o-----o-----o-----o-----o-----o

0 1 2 3 4 5 6 7

not satisfied very

at all satisfied

*Do you consider Simon Weber’s offer fair?*

o-----o-----o-----o-----o-----o-----o-----o

0 1 2 3 4 5 6 7

very unfair very fair

*Situation 6:*

From the total 100 Euros, Simon Weber wants to give **20 Euro** to you, and **40 Euro** to Mister Paulsen.

It is now up to you, how this situation will end. You may choose among three options.

Please select

**one** option:

You accept the offer and everybody obtains the allocated amount. [ ]

You and Mister Paulsen obtain nothing, but Simon Weber may keep his share. [ ]

You and Simon Weber obtain nothing, but Mister Paulsen may keep his share. [ ]

*How satisfied do you feel right now?*

o-----o-----o-----o-----o-----o-----o-----o

0 1 2 3 4 5 6 7

not satisfied very

at all satisfied

*Do you consider Simon Weber’s offer fair?*

o-----o-----o-----o-----o-----o-----o-----o

0 1 2 3 4 5 6 7

very unfair very fair

**Instructions Study 2**

You receive a monetary endowment of

**€ 20.-**

Your task is to share this amount among yourself and two other students. Your role is to be the person who proposes how to allocate the money. The two other students remain anonymous.

There are six different ways in which you may share the total amount of € 20.-:

You keep: Student 1 obtains: Student 2 obtains:

[1] 10.- 5.- 5.-

[2] 18.- 1.- 1.-

[3] 6.- 5.- 9.-

[4] 10.- 1.- 9.-

[5] 14.- 1.- 5.-

[6] 14.- 5.- 1.-

During the next days, the proposal you have chosen will be presented to the two other students. These students will not know who made the proposal.

We will then draw lots to select one of the two students to choose among the following three options:

1. **I accept this allocation!**
2. **I reject – against the person who proposed this share!**
3. **I reject – against the other student!**

The following RULE will apply:

If the student chooses (A), that is, she or he accepts, everybody obtains the respective amount of money (for example, you will obtain € 18 if you marked division No [2] above).

If the student chooses (B), that is, she or he rejects against the person who proposed the share, she or he will obtain NOTHING, You will obtain NOTHING as well, but the third student will obtain his or her respective amount (for example, € 1 in case you marked option [2] above).

If the student chooses (C), that is, she or he rejects against the other student, she or he will obtain NOTHING, the other student will obtain NOTHING as well, but You will obtain your respective amount (for example, you will obtain € 18 in case you marked option [2] above).

Read the RULE very carefully, until you have fully understood. **Then mark that division above which you propose.**

In a few days we will inform you about the outcome, that is, how the other student decided, and how much money you will eventually obtain.

It is important that you make a note of the above Code-No.!Please read carefully which kind of task a student from another course performed.

You are now in the role of **Student 1.**

Please carefully study how the person who proposed the share allocated the money. As a control, please fill in:

The person who proposed the share obtains € .......

I obtain € .......

A third student obtains € .......

Now please answer the following questions:

I consider the proposed share

*very unfair 0 – 1 – 2 – 3 – 4 – 5 – 6 very fair*

Concerning the amount of money the other student obtains, I am

*not envious at all 0 – 1 – 2 – 3 – 4 – 5 – 6 very envious*

Towards the person who proposed the division I feel

*not angry at all 0 – 1 – 2 – 3 – 4 – 5 – 6 very angry*

All in all, in this situation, I feel right now

*very bad 0 – 1 – 2 – 3 – 4 – 5 – 6 very good*

Now, please make your decision (mark one option):

1. **I accept this allocation!**
2. **I reject – against the person who proposed the allocation!**
3. **I reject – against the other student!**

Please note the following RULE when making a decision:

If you choose (A), everybody obtains the respective amount of money.

If you choose (B), you obtain NOTHING, and the person who made the proposal obtains NOTHING as well; the other student obtains his or her respective amount of money.

If you choose (C), you obtain NOTHING, and the other student obtains NOTHING as well; the person who made the proposal obtains his or her respective amount of money.

After you have made your choice, please answer the following questions:

Right now, I feel all in all

*very bad 0 – 1 – 2 – 3 – 4 – 5 – 6 very good*

**Data Study 1**

line,ID,Situation,response,fairness,satisfaction,resp2,offer,other

1,1,1,rejectPR,0,0,0,1,1

2,2,1,rejectPR,1,4,0,1,1

3,3,1,rejectTP,0,5,0,1,1

4,4,1,accept,6,3,1,1,1

5,5,1,rejectPR,0,2,0,1,1

6,6,1,rejectPR,1,2,0,1,1

7,7,1,rejectPR,0,4,0,1,1

8,8,1,rejectPR,1,3,0,1,1

9,9,1,rejectPR,0,1,0,1,1

10,10,1,accept,2,5,1,1,1

11,11,1,accept,0,0,1,1,1

12,12,1,accept,1,1,1,1,1

13,13,1,rejectPR,0,0,0,1,1

14,14,1,rejectPR,0,0,0,1,1

15,15,1,rejectPR,0,4,0,1,1

16,16,1,rejectPR,0,6,0,1,1

17,17,1,rejectPR,0,0,0,1,1

18,18,1,accept,0,0,1,1,1

19,19,1,rejectPR,0,1,0,1,1

20,20,1,rejectPR,0,5,0,1,1

21,21,1,accept,0,2,1,1,1

22,22,1,rejectPR,0,2,0,1,1

23,23,1,rejectPR,0,0,0,1,1

24,24,1,rejectPR,0,3,0,1,1

25,25,1,rejectTP,0,7,0,1,1

26,26,1,rejectPR,2,5,0,1,1

27,27,1,rejectPR,0,0,0,1,1

28,28,1,rejectPR,1,3,0,1,1

29,29,1,accept,6,4,1,1,1

30,30,1,rejectPR,0,2,0,1,1

31,31,1,accept,0,0,1,1,1

32,32,1,rejectPR,0,1,0,1,1

33,33,1,rejectPR,0,2,0,1,1

34,34,1,rejectPR,0,2,0,1,1

35,35,1,accept,0,1,1,1,1

36,36,1,rejectPR,0,0,0,1,1

37,37,1,rejectPR,0,4,0,1,1

38,38,1,rejectPR,1,1,0,1,1

39,39,1,rejectPR,0,0,0,1,1

40,40,1,rejectPR,0,0,0,1,1

41,41,1,rejectPR,0,5,0,1,1

42,42,1,rejectPR,0,4,0,1,1

43,43,1,rejectPR,0,6,0,1,1

44,44,1,rejectPR,0,0,0,1,1

45,45,1,rejectPR,0,5,0,1,1

46,46,1,rejectTP,2,6,0,1,1

47,47,1,rejectTP,1,5,0,1,1

48,48,1,rejectPR,0,5,0,1,1

49,49,1,accept,2,2,1,1,1

50,50,1,rejectPR,0,5,0,1,1

51,51,1,rejectPR,0,2,0,1,1

52,52,1,rejectPR,0,1,0,1,1

53,53,1,rejectPR,1,1,0,1,1

54,54,1,rejectPR,0,5,0,1,1

55,55,1,rejectPR,0,2,0,1,1

56,56,1,accept,1,2,1,1,1

57,57,1,rejectPR,0,0,0,1,1

58,58,1,rejectPR,0,6,0,1,1

59,59,1,rejectPR,2,4,0,1,1

60,60,1,rejectPR,0,0,0,1,1

61,61,1,rejectPR,0,3,0,1,1

62,62,1,rejectPR,0,0,0,1,1

63,63,1,rejectPR,0,6,0,1,1

64,64,1,rejectPR,0,7,0,1,1

65,65,1,rejectPR,0,0,0,1,1

66,66,1,rejectPR,1,2,0,1,1

67,67,1,accept,0,0,1,1,1

68,68,1,rejectPR,0,6,0,1,1

69,69,1,accept,0,2,1,1,1

70,70,1,rejectPR,0,3,0,1,1

71,71,1,rejectPR,0,5,0,1,1

72,72,1,rejectPR,1,5,0,1,1

73,73,1,rejectPR,0,3,0,1,1

74,74,1,rejectTP,5,5,0,1,1

75,75,1,rejectPR,1,5,0,1,1

76,76,1,rejectPR,0,3,0,1,1

77,77,1,rejectPR,0,2,0,1,1

78,78,1,rejectPR,0,1,0,1,1

79,79,1,rejectPR,0,5,0,1,1

80,80,1,rejectPR,0,7,0,1,1

81,81,1,rejectPR,0,1,0,1,1

82,82,1,rejectPR,0,5,0,1,1

83,83,1,rejectTP,0,1,0,1,1

84,84,1,rejectPR,0,7,0,1,1

85,85,1,rejectPR,0,0,0,1,1

86,86,1,rejectPR,0,3,0,1,1

87,87,1,rejectPR,0,5,0,1,1

88,88,1,rejectPR,0,4,0,1,1

89,89,1,rejectPR,0,0,0,1,1

90,90,1,rejectPR,0,5,0,1,1

91,91,1,rejectPR,1,4,0,1,1

92,92,1,rejectPR,0,7,0,1,1

93,93,1,rejectTP,0,0,0,1,1

94,94,1,rejectPR,0,3,0,1,1

95,95,1,rejectPR,0,4,0,1,1

96,96,1,accept,4,2,1,1,1

97,97,1,rejectPR,0,7,0,1,1

98,98,1,rejectPR,0,0,0,1,1

99,99,1,rejectPR,0,1,0,1,1

100,100,1,rejectPR,0,7,0,1,1

101,101,1,rejectPR,0,6,0,1,1

102,102,1,accept,3,3,1,1,1

103,103,1,rejectPR,0,4,0,1,1

104,104,1,rejectPR,2,1,0,1,1

105,105,1,rejectPR,0,0,0,1,1

106,106,1,rejectPR,2,3,0,1,1

107,107,1,rejectPR,0,1,0,1,1

108,108,1,rejectPR,0,1,0,1,1

109,109,1,rejectPR,0,0,0,1,1

110,110,1,rejectPR,1,1,0,1,1

111,111,1,rejectPR,1,1,0,1,1

112,112,1,rejectPR,0,2,0,1,1

113,113,1,accept,0,1,1,1,1

114,114,1,rejectPR,0,5,0,1,1

115,115,1,rejectPR,0,2,0,1,1

116,116,1,rejectPR,0,1,0,1,1

117,117,1,accept,1,1,1,1,1

118,118,1,rejectPR,0,0,0,1,1

119,119,1,rejectTP,0,4,0,1,1

120,120,1,rejectPR,0,1,0,1,1

121,121,1,rejectPR,1,3,0,1,1

122,122,1,rejectPR,0,0,0,1,1

123,123,1,rejectPR,0,2,0,1,1

124,124,1,rejectPR,1,5,0,1,1

125,125,1,rejectPR,1,7,0,1,1

126,126,1,rejectPR,1,5,0,1,1

127,127,1,rejectPR,2,3,0,1,1

128,1,2,rejectPR,2,3,0,1,20

129,2,2,rejectPR,1,4,0,1,20

130,3,2,accept,0,0,1,1,20

131,4,2,rejectTP,2,3,0,1,20

132,5,2,rejectPR,0,1,0,1,20

133,6,2,rejectPR,1,1,0,1,20

134,7,2,rejectPR,1,2,0,1,20

135,8,2,rejectPR,0,1,0,1,20

136,9,2,rejectPR,0,2,0,1,20

137,10,2,accept,2,4,1,1,20

138,11,2,rejectPR,0,0,0,1,20

139,12,2,rejectPR,0,0,0,1,20

140,13,2,rejectPR,0,0,0,1,20

141,14,2,rejectPR,0,3,0,1,20

142,15,2,rejectPR,0,4,0,1,20

143,16,2,rejectPR,0,6,0,1,20

144,17,2,rejectPR,0,0,0,1,20

145,18,2,accept,0,0,1,1,20

146,19,2,rejectPR,0,3,0,1,20

147,20,2,accept,0,7,1,1,20

148,21,2,accept,1,2,1,1,20

149,22,2,rejectPR,0,4,0,1,20

150,23,2,rejectPR,0,0,0,1,20

151,24,2,rejectPR,1,1,0,1,20

152,25,2,rejectTP,0,4,0,1,20

153,26,2,accept,0,0,1,1,20

154,27,2,accept,0,0,1,1,20

155,28,2,rejectPR,1,2,0,1,20

156,29,2,rejectPR,3,5,0,1,20

157,30,2,accept,0,1,1,1,20

158,31,2,rejectPR,0,6,0,1,20

159,32,2,rejectPR,1,2,0,1,20

160,33,2,accept,1,2,1,1,20

161,34,2,rejectPR,1,7,0,1,20

162,35,2,rejectPR,1,1,0,1,20

163,36,2,rejectPR,0,6,0,1,20

164,37,2,rejectPR,0,4,0,1,20

165,38,2,accept,0,1,1,1,20

166,39,2,rejectPR,0,0,0,1,20

167,40,2,rejectPR,0,0,0,1,20

168,41,2,rejectPR,0,3,0,1,20

169,42,2,rejectPR,0,5,0,1,20

170,43,2,rejectPR,1,2,0,1,20

171,44,2,rejectPR,0,0,0,1,20

172,45,2,rejectPR,0,5,0,1,20

173,46,2,accept,3,3,1,1,20

174,47,2,accept,2,2,1,1,20

175,48,2,rejectPR,1,3,0,1,20

176,49,2,accept,0,2,1,1,20

177,50,2,rejectPR,2,5,0,1,20

178,51,2,rejectPR,0,4,0,1,20

179,52,2,rejectPR,1,2,0,1,20

180,53,2,rejectPR,1,1,0,1,20

181,54,2,rejectPR,0,2,0,1,20

182,55,2,rejectPR,0,3,0,1,20

183,56,2,accept,1,1,1,1,20

184,57,2,rejectPR,0,0,0,1,20

185,58,2,rejectPR,0,5,0,1,20

186,59,2,rejectPR,0,5,0,1,20

187,60,2,rejectPR,0,0,0,1,20

188,61,2,rejectPR,1,4,0,1,20

189,62,2,rejectPR,0,0,0,1,20

190,63,2,rejectPR,0,0,0,1,20

191,64,2,rejectPR,0,4,0,1,20

192,65,2,accept,0,0,1,1,20

193,66,2,rejectPR,0,1,0,1,20

194,67,2,accept,0,0,1,1,20

195,68,2,rejectPR,0,5,0,1,20

196,69,2,rejectPR,0,1,0,1,20

197,70,2,rejectPR,0,1,0,1,20

198,71,2,rejectPR,0,5,0,1,20

199,72,2,rejectPR,1,5,0,1,20

200,73,2,rejectPR,0,3,0,1,20

201,74,2,rejectPR,0,3,0,1,20

202,75,2,rejectPR,1,4,0,1,20

203,76,2,rejectPR,0,4,0,1,20

204,77,2,rejectPR,0,3,0,1,20

205,78,2,rejectPR,0,1,0,1,20

206,79,2,rejectPR,1,5,0,1,20

207,80,2,rejectPR,0,7,0,1,20

208,81,2,rejectPR,0,1,0,1,20

209,82,2,rejectPR,0,4,0,1,20

210,83,2,rejectPR,1,1,0,1,20

211,84,2,rejectPR,0,5,0,1,20

212,85,2,rejectPR,0,0,0,1,20

213,86,2,rejectPR,1,4,0,1,20

214,87,2,rejectPR,0,3,0,1,20

215,88,2,rejectPR,0,4,0,1,20

216,89,2,accept,0,3,1,1,20

217,90,2,rejectPR,0,5,0,1,20

218,91,2,rejectPR,0,5,0,1,20

219,92,2,rejectPR,0,7,0,1,20

220,93,2,rejectTP,0,0,0,1,20

221,94,2,accept,1,2,1,1,20

222,95,2,rejectPR,0,2,0,1,20

223,96,2,rejectTP,0,4,0,1,20

224,97,2,rejectPR,0,5,0,1,20

225,98,2,rejectPR,0,1,0,1,20

226,99,2,rejectPR,1,1,0,1,20

227,100,2,rejectPR,0,5,0,1,20

228,101,2,rejectPR,1,6,0,1,20

229,102,2,rejectPR,0,5,0,1,20

230,103,2,rejectPR,0,4,0,1,20

231,104,2,rejectPR,0,3,0,1,20

232,105,2,rejectPR,0,0,0,1,20

233,106,2,rejectPR,2,4,0,1,20

234,107,2,rejectPR,2,2,0,1,20

235,108,2,rejectPR,1,2,0,1,20

236,109,2,rejectPR,1,1,0,1,20

237,110,2,rejectPR,1,2,0,1,20

238,111,2,rejectPR,1,1,0,1,20

239,112,2,rejectPR,0,4,0,1,20

240,113,2,rejectPR,0,0,0,1,20

241,114,2,rejectPR,0,3,0,1,20

242,115,2,accept,1,0,1,1,20

243,116,2,rejectPR,0,1,0,1,20

244,117,2,accept,1,1,1,1,20

245,118,2,rejectPR,0,0,0,1,20

246,119,2,rejectTP,1,4,0,1,20

247,120,2,rejectPR,1,0,0,1,20

248,121,2,accept,1,3,1,1,20

249,122,2,rejectPR,2,4,0,1,20

250,123,2,accept,0,0,1,1,20

251,124,2,rejectPR,0,4,0,1,20

252,125,2,rejectPR,1,7,0,1,20

253,126,2,rejectPR,1,4,0,1,20

254,127,2,rejectPR,2,4,0,1,20

255,1,3,rejectPR,2,2,0,1,40

256,2,3,rejectPR,1,4,0,1,40

257,3,3,accept,0,0,1,1,40

258,4,3,rejectTP,1,3,0,1,40

259,5,3,rejectPR,2,2,0,1,40

260,6,3,rejectPR,0,2,0,1,40

261,7,3,rejectPR,0,3,0,1,40

262,8,3,accept,0,0,1,1,40

263,9,3,rejectPR,2,1,0,1,40

264,10,3,accept,2,5,1,1,40

265,11,3,rejectPR,0,2,0,1,40

266,12,3,rejectTP,0,0,0,1,40

267,13,3,rejectPR,0,1,0,1,40

268,14,3,rejectPR,0,2,0,1,40

269,15,3,rejectTP,0,2,0,1,40

270,16,3,rejectPR,0,2,0,1,40

271,17,3,rejectPR,0,0,0,1,40

272,18,3,accept,0,0,1,1,40

273,19,3,rejectPR,1,4,0,1,40

274,20,3,accept,0,4,1,1,40

275,21,3,accept,0,2,1,1,40

276,22,3,rejectPR,0,1,0,1,40

277,23,3,rejectPR,0,0,0,1,40

278,24,3,rejectPR,1,1,0,1,40

279,25,3,rejectTP,0,5,0,1,40

280,26,3,accept,1,0,1,1,40

281,27,3,accept,0,0,1,1,40

282,28,3,rejectPR,0,0,0,1,40

283,29,3,rejectPR,0,7,0,1,40

284,30,3,rejectPR,0,4,0,1,40

285,31,3,rejectPR,0,3,0,1,40

286,32,3,rejectPR,2,2,0,1,40

287,33,3,rejectPR,0,3,0,1,40

288,34,3,rejectPR,0,1,0,1,40

289,35,3,accept,1,4,1,1,40

290,36,3,rejectPR,0,1,0,1,40

291,37,3,rejectPR,0,3,0,1,40

292,38,3,rejectPR,0,3,0,1,40

293,39,3,rejectPR,0,1,0,1,40

294,40,3,accept,0,0,1,1,40

295,41,3,rejectPR,1,3,0,1,40

296,42,3,rejectPR,1,3,0,1,40

297,43,3,rejectPR,1,2,0,1,40

298,44,3,rejectPR,0,1,0,1,40

299,45,3,rejectPR,0,5,0,1,40

300,46,3,accept,3,3,1,1,40

301,47,3,rejectPR,1,1,0,1,40

302,48,3,accept,2,3,1,1,40

303,49,3,accept,0,1,1,1,40

304,50,3,rejectPR,0,4,0,1,40

305,51,3,rejectPR,1,1,0,1,40

306,52,3,rejectPR,1,2,0,1,40

307,53,3,rejectPR,0,0,0,1,40

308,54,3,rejectPR,0,1,0,1,40

309,55,3,rejectPR,0,1,0,1,40

310,56,3,accept,1,3,1,1,40

311,57,3,accept,2,2,1,1,40

312,58,3,accept,0,0,1,1,40

313,59,3,rejectPR,0,5,0,1,40

314,60,3,rejectPR,0,0,0,1,40

315,61,3,rejectPR,0,5,0,1,40

316,62,3,rejectPR,0,0,0,1,40

317,63,3,rejectPR,0,1,0,1,40

318,64,3,rejectPR,0,5,0,1,40

319,65,3,accept,0,2,1,1,40

320,66,3,rejectPR,1,1,0,1,40

321,67,3,rejectPR,0,0,0,1,40

322,68,3,rejectPR,0,0,0,1,40

323,69,3,rejectPR,0,1,0,1,40

324,70,3,rejectPR,0,0,0,1,40

325,71,3,rejectPR,0,4,0,1,40

326,72,3,rejectPR,1,5,0,1,40

327,73,3,rejectPR,0,3,0,1,40

328,74,3,rejectPR,0,1,0,1,40

329,75,3,rejectPR,0,0,0,1,40

330,76,3,rejectPR,0,2,0,1,40

331,77,3,accept,0,0,1,1,40

332,78,3,rejectPR,0,1,0,1,40

333,79,3,rejectPR,1,5,0,1,40

334,80,3,rejectPR,0,6,0,1,40

335,81,3,rejectPR,0,0,0,1,40

336,82,3,rejectPR,0,0,0,1,40

337,83,3,rejectPR,1,3,0,1,40

338,84,3,rejectPR,0,0,0,1,40

339,85,3,rejectPR,0,0,0,1,40

340,86,3,rejectPR,1,2,0,1,40

341,87,3,rejectPR,1,5,0,1,40

342,88,3,rejectPR,0,3,0,1,40

343,89,3,rejectPR,0,1,0,1,40

344,90,3,rejectPR,0,5,0,1,40

345,91,3,rejectPR,0,5,0,1,40

346,92,3,rejectPR,0,7,0,1,40

347,93,3,rejectTP,0,0,0,1,40

348,94,3,accept,1,1,1,1,40

349,95,3,rejectPR,0,0,0,1,40

350,96,3,rejectTP,0,0,0,1,40

351,97,3,rejectPR,0,3,0,1,40

352,98,3,rejectPR,0,5,0,1,40

353,99,3,rejectPR,0,1,0,1,40

354,100,3,rejectTP,1,1,0,1,40

355,101,3,rejectPR,0,4,0,1,40

356,102,3,rejectPR,1,2,0,1,40

357,103,3,rejectPR,1,4,0,1,40

358,104,3,rejectPR,0,0,0,1,40

359,105,3,rejectPR,0,0,0,1,40

360,106,3,accept,2,1,1,1,40

361,107,3,rejectPR,2,2,0,1,40

362,108,3,rejectPR,1,2,0,1,40

363,109,3,rejectPR,1,2,0,1,40

364,110,3,rejectPR,1,1,0,1,40

365,111,3,rejectPR,2,1,0,1,40

366,112,3,rejectPR,0,0,0,1,40

367,113,3,rejectPR,0,1,0,1,40

368,114,3,rejectPR,0,4,0,1,40

369,115,3,accept,1,0,1,1,40

370,116,3,rejectPR,0,0,0,1,40

371,117,3,accept,1,1,1,1,40

372,118,3,rejectPR,2,2,0,1,40

373,119,3,rejectPR,0,4,0,1,40

374,120,3,rejectPR,0,4,0,1,40

375,121,3,rejectPR,1,3,0,1,40

376,122,3,rejectPR,1,5,0,1,40

377,123,3,rejectPR,0,3,0,1,40

378,124,3,rejectPR,0,2,0,1,40

379,125,3,rejectPR,2,4,0,1,40

380,126,3,rejectPR,2,5,0,1,40

381,127,3,rejectPR,1,4,0,1,40

382,1,4,accept,2,4,1,20,1

383,2,4,rejectPR,1,4,0,20,1

384,3,4,rejectTP,1,3,0,20,1

385,4,4,accept,1,3,1,20,1

386,5,4,accept,0,1,1,20,1

387,6,4,accept,1,3,1,20,1

388,7,4,rejectPR,1,1,0,20,1

389,8,4,accept,0,2,1,20,1

390,9,4,accept,1,3,1,20,1

391,10,4,accept,2,5,1,20,1

392,11,4,rejectPR,0,7,0,20,1

393,12,4,accept,1,2,1,20,1

394,13,4,accept,0,1,1,20,1

395,14,4,rejectPR,0,1,0,20,1

396,15,4,accept,2,2,1,20,1

397,16,4,rejectPR,0,1,0,20,1

398,17,4,accept,1,3,1,20,1

399,18,4,accept,0,0,1,20,1

400,19,4,rejectPR,0,2,0,20,1

401,20,4,accept,2,5,1,20,1

402,21,4,accept,0,2,1,20,1

403,22,4,rejectPR,1,2,0,20,1

404,23,4,accept,0,0,1,20,1

405,24,4,accept,1,1,1,20,1

406,25,4,rejectTP,0,6,0,20,1

407,26,4,rejectPR,1,2,0,20,1

408,27,4,accept,0,1,1,20,1

409,28,4,accept,1,0,1,20,1

410,29,4,accept,7,7,1,20,1

411,30,4,accept,0,3,1,20,1

412,31,4,accept,0,0,1,20,1

413,32,4,accept,1,3,1,20,1

414,33,4,accept,1,3,1,20,1

415,34,4,rejectPR,0,3,0,20,1

416,35,4,accept,0,0,1,20,1

417,36,4,rejectPR,0,1,0,20,1

418,37,4,rejectPR,0,5,0,20,1

419,38,4,accept,0,2,1,20,1

420,39,4,accept,0,1,1,20,1

421,40,4,rejectPR,0,0,0,20,1

422,41,4,rejectPR,1,6,0,20,1

423,42,4,accept,1,1,1,20,1

424,43,4,accept,4,4,1,20,1

425,44,4,accept,3,3,1,20,1

426,45,4,accept,0,2,1,20,1

427,46,4,accept,3,3,1,20,1

428,47,4,accept,1,2,1,20,1

429,48,4,rejectPR,0,4,0,20,1

430,49,4,rejectPR,0,2,0,20,1

431,50,4,accept,2,2,1,20,1

432,51,4,accept,0,1,1,20,1

433,52,4,accept,1,2,1,20,1

434,53,4,rejectPR,1,1,0,20,1

435,54,4,rejectPR,0,5,0,20,1

436,55,4,accept,3,4,1,20,1

437,56,4,accept,0,4,1,20,1

438,57,4,rejectPR,6,7,0,20,1

439,58,4,accept,2,3,1,20,1

440,59,4,rejectPR,0,6,0,20,1

441,60,4,rejectPR,0,0,0,20,1

442,61,4,rejectPR,1,5,0,20,1

443,62,4,rejectPR,0,0,0,20,1

444,63,4,rejectTP,0,5,0,20,1

445,64,4,rejectPR,0,5,0,20,1

446,65,4,accept,0,0,1,20,1

447,66,4,accept,1,3,1,20,1

448,67,4,accept,2,4,1,20,1

449,68,4,accept,0,2,1,20,1

450,69,4,accept,1,1,1,20,1

451,70,4,accept,0,2,1,20,1

452,71,4,rejectPR,0,2,0,20,1

453,72,4,rejectPR,1,5,0,20,1

454,73,4,accept,0,3,1,20,1

455,74,4,accept,0,6,1,20,1

456,75,4,rejectPR,1,3,0,20,1

457,76,4,accept,0,1,1,20,1

458,77,4,accept,2,2,1,20,1

459,78,4,accept,0,1,1,20,1

460,79,4,accept,0,5,1,20,1

461,80,4,rejectPR,0,6,0,20,1

462,81,4,rejectPR,0,1,0,20,1

463,82,4,accept,1,4,1,20,1

464,83,4,rejectPR,0,4,0,20,1

465,84,4,rejectPR,1,3,0,20,1

466,85,4,accept,0,0,1,20,1

467,86,4,accept,2,3,1,20,1

468,87,4,rejectPR,1,5,0,20,1

469,88,4,rejectPR,0,3,0,20,1

470,89,4,accept,1,2,1,20,1

471,90,4,rejectPR,0,4,0,20,1

472,91,4,rejectPR,0,5,0,20,1

473,92,4,accept,2,7,1,20,1

474,93,4,accept,1,1,1,20,1

475,94,4,accept,1,2,1,20,1

476,95,4,rejectPR,1,4,0,20,1

477,96,4,accept,0,0,1,20,1

478,97,4,rejectPR,0,7,0,20,1

479,98,4,rejectPR,0,2,0,20,1

480,99,4,accept,3,3,1,20,1

481,100,4,accept,2,4,1,20,1

482,101,4,rejectPR,1,6,0,20,1

483,102,4,accept,0,3,1,20,1

484,103,4,rejectPR,0,4,0,20,1

485,104,4,rejectPR,0,1,0,20,1

486,105,4,accept,1,3,1,20,1

487,106,4,rejectPR,1,4,0,20,1

488,107,4,accept,2,2,1,20,1

489,108,4,accept,0,0,1,20,1

490,109,4,rejectPR,1,1,0,20,1

491,110,4,rejectPR,1,1,0,20,1

492,111,4,accept,3,3,1,20,1

493,112,4,accept,0,1,1,20,1

494,113,4,rejectPR,0,3,0,20,1

495,114,4,accept,1,3,1,20,1

496,115,4,rejectPR,1,6,0,20,1

497,116,4,accept,0,2,1,20,1

498,117,4,accept,1,2,1,20,1

499,118,4,accept,2,2,1,20,1

500,119,4,rejectTP,1,4,0,20,1

501,120,4,rejectPR,1,5,0,20,1

502,121,4,accept,1,4,1,20,1

503,122,4,rejectPR,0,2,0,20,1

504,123,4,accept,0,2,1,20,1

505,124,4,accept,1,4,1,20,1

506,125,4,accept,2,4,1,20,1

507,126,4,accept,2,3,1,20,1

508,127,4,accept,3,5,1,20,1

509,1,5,accept,3,3,1,20,20

510,2,5,rejectPR,1,4,0,20,20

511,3,5,accept,3,6,1,20,20

512,4,5,accept,7,3,1,20,20

513,5,5,accept,2,6,1,20,20

514,6,5,accept,3,4,1,20,20

515,7,5,accept,2,1,1,20,20

516,8,5,accept,3,4,1,20,20

517,9,5,accept,6,6,1,20,20

518,10,5,accept,4,5,1,20,20

519,11,5,accept,2,3,1,20,20

520,12,5,accept,2,3,1,20,20

521,13,5,accept,0,2,1,20,20

522,14,5,accept,5,5,1,20,20

523,15,5,accept,1,3,1,20,20

524,16,5,accept,3,5,1,20,20

525,17,5,accept,3,3,1,20,20

526,18,5,accept,2,2,1,20,20

527,19,5,accept,2,3,1,20,20

528,20,5,accept,3,7,1,20,20

529,21,5,accept,2,3,1,20,20

530,22,5,rejectPR,1,3,0,20,20

531,23,5,accept,2,2,1,20,20

532,24,5,accept,3,2,1,20,20

533,25,5,accept,1,6,1,20,20

534,26,5,accept,3,4,1,20,20

535,27,5,accept,3,4,1,20,20

536,28,5,accept,4,4,1,20,20

537,29,5,accept,7,7,1,20,20

538,30,5,rejectPR,0,2,0,20,20

539,31,5,accept,2,5,1,20,20

540,32,5,accept,3,3,1,20,20

541,33,5,accept,3,2,1,20,20

542,34,5,accept,3,4,1,20,20

543,35,5,accept,2,3,1,20,20

544,36,5,rejectPR,1,2,0,20,20

545,37,5,accept,1,1,1,20,20

546,38,5,accept,1,2,1,20,20

547,39,5,accept,3,3,1,20,20

548,40,5,accept,2,2,1,20,20

549,41,5,accept,6,6,1,20,20

550,42,5,accept,3,4,1,20,20

551,43,5,accept,3,4,1,20,20

552,44,5,accept,4,5,1,20,20

553,45,5,accept,0,0,1,20,20

554,46,5,accept,3,5,1,20,20

555,47,5,accept,2,3,1,20,20

556,48,5,accept,3,3,1,20,20

557,49,5,accept,2,5,1,20,20

558,50,5,accept,5,6,1,20,20

559,51,5,accept,0,2,1,20,20

560,52,5,accept,3,2,1,20,20

561,53,5,rejectPR,1,2,0,20,20

562,54,5,accept,2,3,1,20,20

563,55,5,accept,3,3,1,20,20

564,56,5,accept,3,5,1,20,20

565,57,5,rejectPR,0,0,0,20,20

566,58,5,accept,1,1,1,20,20

567,59,5,accept,4,6,1,20,20

568,60,5,rejectPR,0,0,0,20,20

569,61,5,accept,2,4,1,20,20

570,62,5,rejectPR,0,0,0,20,20

571,63,5,accept,3,4,1,20,20

572,64,5,accept,1,3,1,20,20

573,65,5,accept,2,2,1,20,20

574,66,5,accept,3,3,1,20,20

575,67,5,accept,1,3,1,20,20

576,68,5,accept,1,1,1,20,20

577,69,5,accept,4,4,1,20,20

578,70,5,accept,4,5,1,20,20

579,71,5,accept,2,4,1,20,20

580,72,5,rejectPR,1,5,0,20,20

581,73,5,accept,0,3,1,20,20

582,74,5,accept,7,7,1,20,20

583,75,5,accept,3,3,1,20,20

584,76,5,accept,3,4,1,20,20

585,77,5,accept,2,3,1,20,20

586,78,5,accept,2,1,1,20,20

587,79,5,rejectPR,1,5,0,20,20

588,80,5,rejectPR,0,7,0,20,20

589,81,5,rejectPR,1,3,0,20,20

590,82,5,accept,3,4,1,20,20

591,83,5,accept,1,2,1,20,20

592,84,5,rejectPR,0,2,0,20,20

593,85,5,rejectPR,1,1,0,20,20

594,86,5,accept,2,3,1,20,20

595,87,5,rejectTP,2,4,0,20,20

596,88,5,accept,1,2,1,20,20

597,89,5,accept,1,4,1,20,20

598,90,5,accept,2,5,1,20,20

599,91,5,accept,3,4,1,20,20

600,92,5,accept,1,2,1,20,20

601,93,5,accept,3,4,1,20,20

602,94,5,rejectTP,1,3,0,20,20

603,95,5,rejectPR,1,3,0,20,20

604,96,5,accept,6,7,1,20,20

605,97,5,accept,0,2,1,20,20

606,98,5,accept,1,2,1,20,20

607,99,5,accept,2,2,1,20,20

608,100,5,accept,2,4,1,20,20

609,101,5,rejectPR,2,3,0,20,20

610,102,5,accept,4,4,1,20,20

611,103,5,accept,2,4,1,20,20

612,104,5,accept,5,4,1,20,20

613,105,5,accept,3,3,1,20,20

614,106,5,accept,3,3,1,20,20

615,107,5,accept,3,3,1,20,20

616,108,5,accept,1,3,1,20,20

617,109,5,accept,1,1,1,20,20

618,110,5,rejectPR,1,1,0,20,20

619,111,5,accept,3,3,1,20,20

620,112,5,accept,0,3,1,20,20

621,113,5,accept,0,3,1,20,20

622,114,5,accept,3,3,1,20,20

623,115,5,accept,2,2,1,20,20

624,116,5,accept,3,4,1,20,20

625,117,5,accept,4,4,1,20,20

626,118,5,accept,2,3,1,20,20

627,119,5,accept,4,4,1,20,20

628,120,5,accept,5,6,1,20,20

629,121,5,accept,3,3,1,20,20

630,122,5,accept,5,6,1,20,20

631,123,5,accept,1,2,1,20,20

632,124,5,accept,3,4,1,20,20

633,125,5,accept,3,3,1,20,20

634,126,5,accept,4,4,1,20,20

635,127,5,accept,2,4,1,20,20

636,1,6,accept,3,3,1,20,40

637,2,6,rejectPR,1,4,0,20,40

638,3,6,accept,1,1,1,20,40

639,4,6,rejectTP,2,3,0,20,40

640,5,6,accept,3,3,1,20,40

641,6,6,accept,2,2,1,20,40

642,7,6,accept,3,4,1,20,40

643,8,6,accept,2,2,1,20,40

644,9,6,accept,5,4,1,20,40

645,10,6,accept,3,5,1,20,40

646,11,6,accept,0,0,1,20,40

647,12,6,accept,2,1,1,20,40

648,13,6,accept,0,1,1,20,40

649,14,6,accept,3,4,1,20,40

650,15,6,accept,2,2,1,20,40

651,16,6,accept,3,3,1,20,40

652,17,6,rejectPR,0,1,0,20,40

653,18,6,accept,0,0,1,20,40

654,19,6,accept,3,3,1,20,40

655,20,6,accept,2,7,1,20,40

656,21,6,accept,3,3,1,20,40

657,22,6,rejectPR,2,0,0,20,40

658,23,6,accept,1,2,1,20,40

659,24,6,rejectPR,1,1,0,20,40

660,25,6,rejectTP,0,5,0,20,40

661,26,6,accept,2,2,1,20,40

662,27,6,accept,2,2,1,20,40

663,28,6,accept,3,2,1,20,40

664,29,6,accept,3,5,1,20,40

665,30,6,accept,0,1,1,20,40

666,31,6,accept,3,5,1,20,40

667,32,6,accept,3,4,1,20,40

668,33,6,accept,2,3,1,20,40

669,34,6,accept,1,3,1,20,40

670,35,6,accept,3,4,1,20,40

671,36,6,rejectPR,2,2,0,20,40

672,37,6,accept,1,2,1,20,40

673,38,6,accept,2,3,1,20,40

674,39,6,accept,2,2,1,20,40

675,40,6,accept,3,1,1,20,40

676,41,6,accept,2,2,1,20,40

677,42,6,accept,1,2,1,20,40

678,43,6,accept,3,3,1,20,40

679,44,6,rejectPR,0,2,0,20,40

680,45,6,accept,1,1,1,20,40

681,46,6,accept,3,4,1,20,40

682,47,6,accept,2,2,1,20,40

683,48,6,accept,2,5,1,20,40

684,49,6,accept,2,3,1,20,40

685,50,6,accept,2,3,1,20,40

686,51,6,accept,3,4,1,20,40

687,52,6,accept,2,2,1,20,40

688,53,6,accept,1,2,1,20,40

689,54,6,accept,2,1,1,20,40

690,55,6,accept,2,4,1,20,40

691,56,6,accept,2,3,1,20,40

692,57,6,rejectTP,2,2,0,20,40

693,58,6,accept,2,1,1,20,40

694,59,6,accept,3,6,1,20,40

695,60,6,rejectPR,0,0,0,20,40

696,61,6,accept,2,3,1,20,40

697,62,6,rejectPR,0,0,0,20,40

698,63,6,accept,2,3,1,20,40

699,64,6,accept,2,4,1,20,40

700,65,6,accept,2,3,1,20,40

701,66,6,accept,2,3,1,20,40

702,67,6,accept,3,3,1,20,40

703,68,6,accept,1,3,1,20,40

704,69,6,accept,2,3,1,20,40

705,70,6,accept,3,3,1,20,40

706,71,6,accept,3,4,1,20,40

707,72,6,rejectPR,2,5,0,20,40

708,73,6,accept,1,3,1,20,40

709,74,6,accept,0,3,1,20,40

710,75,6,rejectPR,3,4,0,20,40

711,76,6,accept,3,2,1,20,40

712,77,6,accept,1,1,1,20,40

713,78,6,accept,1,2,1,20,40

714,79,6,accept,1,5,1,20,40

715,80,6,rejectPR,0,5,0,20,40

716,81,6,rejectPR,1,1,0,20,40

717,82,6,accept,1,2,1,20,40

718,83,6,accept,3,2,1,20,40

719,84,6,accept,1,1,1,20,40

720,85,6,accept,2,2,1,20,40

721,86,6,accept,1,3,1,20,40

722,87,6,rejectPR,2,4,0,20,40

723,88,6,accept,2,5,1,20,40

724,89,6,accept,1,4,1,20,40

725,90,6,accept,2,6,1,20,40

726,91,6,accept,2,2,1,20,40

727,92,6,accept,4,5,1,20,40

728,93,6,accept,2,2,1,20,40

729,94,6,accept,1,2,1,20,40

730,95,6,rejectPR,0,0,0,20,40

731,96,6,accept,3,4,1,20,40

732,97,6,accept,1,3,1,20,40

733,98,6,accept,1,3,1,20,40

734,99,6,accept,3,2,1,20,40

735,100,6,accept,2,3,1,20,40

736,101,6,rejectPR,2,3,0,20,40

737,102,6,accept,1,4,1,20,40

738,103,6,accept,2,4,1,20,40

739,104,6,accept,3,3,1,20,40

740,105,6,accept,1,1,1,20,40

741,106,6,accept,4,4,1,20,40

742,107,6,rejectPR,2,2,0,20,40

743,108,6,accept,2,2,1,20,40

744,109,6,accept,1,1,1,20,40

745,110,6,rejectPR,1,1,0,20,40

746,111,6,accept,3,3,1,20,40

747,112,6,accept,0,1,1,20,40

748,113,6,accept,0,0,1,20,40

749,114,6,accept,3,3,1,20,40

750,115,6,accept,3,4,1,20,40

751,116,6,accept,3,0,1,20,40

752,117,6,accept,3,3,1,20,40

753,118,6,accept,2,3,1,20,40

754,119,6,accept,2,4,1,20,40

755,120,6,accept,3,2,1,20,40

756,121,6,accept,3,2,1,20,40

757,122,6,accept,3,4,1,20,40

758,123,6,rejectPR,0,0,0,20,40

759,124,6,accept,3,2,1,20,40

760,125,6,accept,2,3,1,20,40

761,126,6,accept,3,4,1,20,40

762,127,6,accept,2,3,1,20,40

**Data Study 2**

ID,condition,fair,envy,anger,feel1,feel2,accept,third,responder

1,1,4,0,1,3,4,1,5,5

2,6,2,0,2,1,5,0,1,5

3,6,1,2,4,2,6,1,1,5

4,1,4,2,3,4,3,1,5,5

5,1,3,1,0,5,6,1,5,5

6,4,2,5,5,1,3,0,9,1

7,3,2,2,2,3,3,1,9,5

8,3,5,4,0,4,5,1,9,5

9,6,3,0,0,4,6,1,1,5

10,1,3,2,0,4,3,1,5,5

11,1,4,2,0,5,5,1,5,5

12,4,3,4,2,1,5,0,9,1

13,3,6,1,0,3,4,1,9,5

14,4,2,1,0,4,6,1,9,1

15,3,5,2,1,6,6,1,9,5

16,3,5,2,0,3,5,1,9,5

17,1,4,0,2,5,5,1,5,5

18,5,1,5,5,4,4,1,5,1

19,6,2,0,1,3,3,1,1,5

20,5,2,3,4,3,5,0,5,1

21,5,1,4,4,2,3,0,5,1

22,4,1,4,6,2,4,0,9,1

23,2,1,1,4,3,4,0,1,1

24,1,4,0,4,5,5,1,5,5

25,3,5,0,0,6,6,1,9,5

26,6,3,3,4,4,3,0,1,5

27,1,4,4,2,3,4,1,5,5

28,3,1,5,1,3,4,1,9,5

29,6,3,0,5,3,4,1,1,5

30,1,5,0,1,5,5,1,5,5

31,2,1,1,5,2,3,1,1,1

32,6,2,4,2,2,4,1,1,5

33,5,0,6,6,1,1,1,5,1

34,1,4,0,4,3,4,1,5,5

35,6,1,5,3,2,4,1,1,5

36,4,2,6,0,3,3,1,9,1

37,6,1,0,3,3,4,1,1,5

38,2,2,2,1,5,6,0,1,1

39,5,2,4,1,4,5,1,5,1

40,3,6,0,0,6,6,1,9,5

41,1,4,0,2,4,4,1,5,5

42,2,2,0,4,3,4,0,1,1

43,4,2,4,3,2,4,1,9,1

44,1,2,2,2,5,5,1,5,5

45,6,1,0,2,3,3,1,1,5

46,5,0,1,2,5,6,0,5,1

47,4,2,1,3,4,4,1,9,1

48,3,5,2,0,4,5,1,9,5

49,1,2,0,0,6,6,1,5,5

50,6,2,2,4,2,4,1,1,5

51,6,1,0,2,3,4,1,1,5

52,4,1,4,3,3,4,1,9,1

53,5,1,3,3,3,3,1,5,1

54,5,3,4,4,2,4,1,5,1

55,2,0,5,4,3,2,1,1,1

56,6,2,4,4,4,5,1,1,5

57,2,0,0,3,3,5,0,1,1

58,3,5,1,1,5,6,1,9,5

59,6,5,2,5,3,3,0,1,5

60,5,2,1,4,3,3,0,5,1

61,3,4,1,1,3,4,1,9,5

62,4,0,0,1,5,5,0,9,1

63,2,1,0,3,3,3,0,1,1

64,2,2,0,3,4,4,1,1,1

65,5,0,6,0,6,6,0,5,1

66,2,0,4,2,4,3,0,1,1

67,4,0,5,5,2,2,0,9,1

68,2,0,0,3,4,5,0,1,1

69,3,5,1,0,6,4,1,9,5

70,2,1,0,3,4,4,0,1,1

71,3,1,4,4,3,2,1,9,5

72,5,1,5,0,3,3,1,5,1

73,2,0,0,6,3,2,0,1,1

74,4,5,5,2,3,5,1,9,1

75,1,5,3,1,5,5,1,5,5

76,3,6,0,0,6,6,1,9,5

77,5,2,1,3,2,5,1,5,1

78,4,2,5,5,2,3,1,9,1

79,5,1,0,4,3,3,1,5,1

80,5,0,0,5,3,3,0,5,1

81,6,2,0,3,3,2,0,1,5

82,2,0,0,5,1,3,0,1,1

83,1,5,0,1,4,6,1,5,5

84,3,6,5,0,4,5,1,9,5

85,5,1,3,6,3,3,0,5,1

86,3,4,5,1,3,3,1,9,5

87,4,1,4,5,3,4,0,9,1

88,3,5,0,0,6,5,1,9,5

89,6,1,0,5,3,6,0,1,5

90,6,1,0,4,5,4,1,1,5

91,1,5,0,0,5,5,1,5,5

92,1,5,1,0,4,5,1,5,5

93,2,0,0,5,2,3,0,1,1

94,2,0,0,3,3,3,0,1,1

95,5,2,4,4,1,1,0,5,1

96,4,3,1,1,3,3,1,9,1

97,4,1,5,3,3,3,1,9,1

98,5,1,4,4,3,3,1,5,1

99,4,0,3,5,2,2,0,9,1

100,4,0,1,3,3,0,1,9,1

101,6,1,0,5,2,5,0,1,5

102,3,5,3,0,4,6,1,9,5

103,6,0,0,6,0,5,0,1,5

104,4,2,4,3,2,2,0,9,1

105,2,4,5,1,3,3,1,1,1

106,2,0,3,3,3,3,0,1,1

107,1,3,0,2,4,5,1,5,5

108,2,2,0,4,3,2,1,1,1

109,1,1,0,5,3,4,1,5,5

110,6,1,0,5,3,4,1,1,5

111,3,4,5,2,5,5,1,9,5

112,1,5,2,1,6,5,1,5,5

113,1,5,0,1,3,5,1,5,5

114,2,1,0,5,1,3,0,1,1

115,5,1,2,5,3,3,0,5,1

116,3,1,4,4,2,3,1,9,5

117,2,0,0,6,0,3,0,1,1

118,6,2,0,1,3,3,1,1,5

**R script Study 1**

# === Ultimatum Study, Study 1 ===

# (c) Hans-Ruediger Pfister and Gisela Boehm, 2011

# ================================================

# === Data Input ===

study1 <- read.table("study1.txt", header=TRUE, sep=",")

# Define factor variables

study1$ID <- as.factor(study1$ID)

study1$Situation <- as.factor(study1$Situation)

study1$resp2 <- as.factor(study1$resp2)

study1$offerF <- as.factor(study1$offer)

study1$otherF <- as.factor(study1$other)

# === Variables in data frame study1 ===

# line: line no of input file

# ID: subject identifier 1..127

# Situation:

# response: accept / reject towards proposer / reject towards third party

# fairness: fairness rating (0 .. 7)

# satisfaction: satisfaction rating (0 .. 7)

# resp2: dichotomized response variable: accept=1 / reject=0

# offer: share (of 100) offered to responder: 1 / 20

# other: share (of 100) offered to third party: 1 / 20 / 40

# offer: offer variable coded as 2-level factor

# other: other variable coded as 3-level factor

# === Frequencies of accept/reject decisions ===

with(study1, table(response, offerF))

with(study1, table(response, otherF))

# === Multinomial Logit Analysis ===

library(mlogit)

s1.mlogit <- mlogit(response ~ 1|offerF * otherF,

data=mlogit.data(study1, choice="response", shape="wide"),

reflevel=1)

summary(s1.mlogit)

# === Logistic Regression, Dep Var: resp2 (dichotomized response) ===

library(lme4)

resp2.glmer <- glmer(resp2 ~ offer * other + (1|ID),

data=study1, family=binomial)

summary(resp2.glmer)

# === ANOVA with fairness as dependent variable ===

fairness.aov <- aov(fairness ~ offerF * otherF + Error(ID/(offerF*otherF)),

data=study1)

summary(fairness.aov)

# === ANOVA with satisfaction as a function of shares ===

satisfaction.aov <- aov(satisfaction ~ offerF * otherF + Error(ID/(offerF*otherF)),

data=study1)

summary(satisfaction.aov)

# === ANOVA with satisfaction as a function of response and shares ===

options(contrasts=c("contr.sum", "contr.poly"))

library(lme4)

library(car)

satisResponse.lmer <- lmer(satisfaction ~ response * offerF + (1|ID),

data=study1)

Anova(satisResponse.lmer, type="III")

options(contrasts=c("contr.treatment", "contr.poly"))

###########################################

**R script Study 2**

# === Ultimatum Study, Study 2 ===

# (c) Hans-Ruediger Pfister and Gisela Boehm, 2011

# ================================================

# === Data Input ===

study2 <- read.table("study2.txt", header=TRUE, sep=",")

# Variables in data frame study2

# ID: subject identifier

# condition: experimental condition (Table 3, paper)

# fair: fairness rating 0 .. 6

# envy: envy rating 0 .. 6

# anger: anger rating 0 .. 6

# feel1: general feeling before choice 0 .. 6

# feel2: general feeling after choice 0 .. 6

# accept: decision to accept offer, 1=yes, 2=no

# third: share of third party, 1=low, 5=medium, 9=high

# responder: share of responder, 1=low, 5=medium

# Define factor variables

study2$ID <- as.factor(study2$ID)

study2$condition <- as.factor(study2$condition)

study2$responderF <- as.factor(study2$responder)

study2$thirdF <- as.factor(study2$third)

study2$proposerF <- factor(with(study2, 20 - responder - third))

# Frequencies of accept decisions across experimental conditions

with(study2, table(accept, condition))

with(study2, table(accept, responderF, thirdF))

# === Logistic Regression with acceptance decision ===

library(car)

options(contrasts= c("contr.sum", "contr.poly"))

accept.glm <- glm(accept ~ responderF * thirdF,

data=study2, family=binomial)

Anova(accept.glm, type="III")

# === Pairwise comparisons of acceptances in realistic distributions

with(study2, table(accept, condition))

# Comparing proportions of acceptances: distribution 6 vs. 1

prop.test(c(14,21), c(21,21))

# Comparing proportions of acceptances: distribution 6 vs. 2

prop.test(c(14,5), c(21,20))

# === ANOVA with fairness as dependent variable ===

library(car)

options(contrasts= c("contr.sum", "contr.poly"))

fairness.aov <- aov(fair ~ responderF * thirdF,

data=study2)

Anova(fairness.aov, type="III")

leveneTest(fairness.aov)

# pairwise comparisons of conditions

TukeyHSD(aov(fair ~ condition, data=study2))

# === ANOVA with anger as dependent variable ===

library(car)

options(contrasts= c("contr.sum", "contr.poly"))

anger.aov <- aov(anger ~ responderF * thirdF,

data=study2)

Anova(anger.aov, type="III")

leveneTest(anger.aov)

# pairwise comparisons of conditions

TukeyHSD(aov(anger ~ condition, data=study2))

# === ANOVA with envy as dependent variable ===

library(car)

options(contrasts= c("contr.sum", "contr.poly"))

envy.aov <- aov(envy ~ responderF * thirdF,

data=study2)

Anova(envy.aov, type="III")

leveneTest(envy.aov)

# pairwise comparisons of conditions

TukeyHSD(aov(envy ~ condition, data=study2))

# === Regression Analysis: Anger and Envy regressed on differences in shares ===

# compute difference variables

study2$proposer <- with(study2, 20 - responder - third)

study2$sharediff <- with(study2, responder - third)

study2$propdiff <- with(study2, responder - proposer)

summary(lm(anger ~ sharediff + propdiff, data=study2))

summary(lm(envy ~ sharediff + propdiff, data=study2))

# === Regression Analysis: Acceptance regressed on emotions ===

summary(glm(accept ~ fair + anger + envy, data=study2, family=binomial))

# only for subset of realistic distributions 6,2,1

summary(glm(accept ~ fair + anger + envy,

data=subset(study2, study2$condition %in% c(1,2,6)),

family=binomial))

# === Mediator Analysis (Sobel Test): anger mediates acceptance ===

library(multilevel)

anger.sobel <- with(study2, sobel(propdiff, anger, accept))

anger.sobel

pnorm(anger.sobel$z.value, lower=FALSE)

# === ANOVA of general feeling before and after acceptance decision ===

# data preparation for repeated measure analysis

attach(study2)

Feel <- c(feel1, feel2)

Time <- gl(2, 118)

levels(Time) <- c("before", "after")

Accept <- c(accept, accept)

IDcode <- as.factor(c(ID, ID))

Condition <- rep(condition, 2)

detach(study2)

study2Time <- data.frame(IDcode, Time, Feel, Accept, Condition)

# Repeated Measurement ANOVA

summary(aov(Feel ~ Time * Accept + Error(IDcode/Time),

data=study2Time))

# with subset of realistic distributions 6,2,1

summary(aov(Feel ~ Time * Accept + Error(IDcode/Time),

data=subset(study2Time, study2Time$Condition %in% c(6,2,1))))

############################################################
